# Supplementary material
Source: PubMed Central journal article supplement (PMC3973508)
Supplement: SD1.pdf [file SD1.pdf]

## Assessment of Knowledge, Attitude and Practice on Bilharzia Control by Communities in western Kenya, Socio-Demographic Profile

Date of interview: \_\_\_\_\_ Assigned Number: \_\_\_\_\_

Settlement Unit: \_\_\_\_\_

1. Participant's gender Male  Female

2. Participant's age \_\_\_\_\_

3. What is the participant's level of education?

None  Primary  Secondary  Post Secondary

4. Which religious group do you/name belong to?

Catholic  Legio Maria  Anglican  Baptist Methodist  SDA  Presbyterian  Muslim  Traditionalist  Roho

Nomiah  No Religion

Other specify .....

5. What is the marital Status?

Divorced

Living with another

Married

Separated

Single (never married)

Widowed

Would rather not say

6. What is your most important income-generating activity?

Subsistence farming  Fishing  Salaried worker (e.g., teacher, medical worker, office... )

Business owner (e.g., duka, kiosk)

Skilled labor (e.g., carpenter, tailor, jua kali)

Unskilled labor (e.g., Shamba, construction)

Other, Specify .....

7. What group are you representing?

Volunteer

CHW

Leader of a group

Church leader

TBA

Herbalist

Other Specify

8. Trainings attended (At least 3 most recent)

| Training | Year | Duration |
|----------|------|----------|
|          |      |          |
|          |      |          |
|          |      |          |

Assessment of Knowledge, Attitude, and Practice on Bilharzia Control  
by Communities in Western Kenya

FOCUS GROUP DISCUSSION GUIDE

**WHO TO INTERVIEW:** COMMUNITY RESOURCE PERSONS WHO ARE RESIDENTS OF WESTERN KENYA.

Good day. I am ... .. and my colleagues are ... .. We are from ... .. and we are here to learn from you about bilharzia control in your community. The objective of this study is to collect information on the knowledge, attitude, and practices on Bilharzia and its control in western Kenya. The information you provide will be used to improve Bilharzia control. We have invited you because of your experience in this community and the confidence we have in you to be able to reflect the situation in western Kenya. We will talk to you for about 45–60 minutes. Participation in this discussion is voluntary. Your name and what you say to us during this discussion will be kept confidential.

In this discussion, every answer within the study subject is correct, because it is your view on the subject of discussion. Every opinion is important and should be freely expressed. What we will learn from you today will be useful in the future in strengthening bilharzia control measures. We wish to request your permission to take notes and to tape record the conversation so as to ensure that we do not miss or misinterpret any of your views after the discussion.

Do you have any questions about the study? YES/NO (**Moderator to record questions and answers provided**).

Thank you for your assistance.
